# Supplementary material
Source: PubMed Central journal article supplement (PMC2648096)
Supplement: tpc.107.057885_1.pdf [file tpc.107.057885_1.pdf]

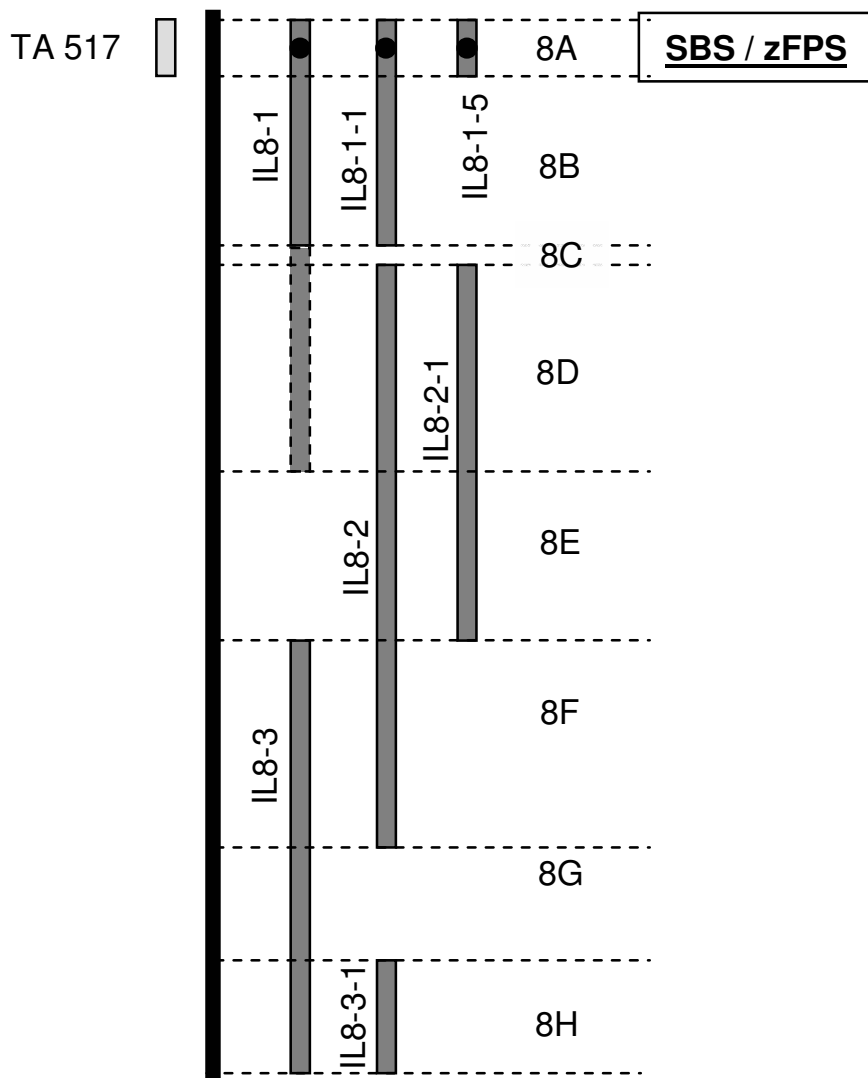

## Chr 8

**Supplemental Figure 2.** Chromosome localization of the *SBS* and *zFPS* genes on the tomato IL map. The schematic tomato chromosome 8 map is from Pan et al. (2000). Bins (grey bars) are designated by the chromosome number followed by a capital letter and indicate the unique area of introgression overlap. TA517 is a near-isogenic line carrying a small chromosome 8 introgression from *S. habrochaites* LA1777 and producing class II sesquiterpenes (Van der Hoeven et al., 2000). The black circle indicates the result of RFLP mapping with the *SBS* and *zFPS* genes.

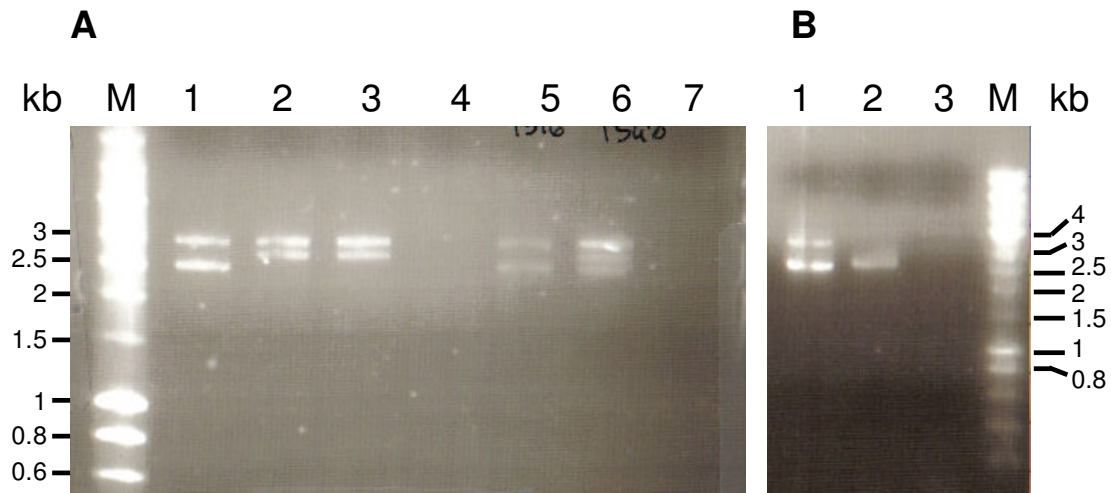

**Supplemental Figure 3.** PCR polymorphism of the *SBS* and *zFPS* genes.

**A.** Genomic polymorphism of the *zFPS* gene. PCR was performed with primers 9I01 and 9I02 on genomic DNA of the following plant species and lines: 1, *Solanum lycopersicum* E6203; 2, *Solanum habrochaites* LA1777; 3, Introgression line TA517 which is homozygous for the *Sst2* allele from *S. habrochaites*; 4, *Solanum pennellii*; 5, Introgression line TA1316 which does not carry the *Sst2* locus; 6, Introgression line TA1548 which is heterozygous for the *Sst2* allele from *S. habrochaites*; 7, no DNA control. M, DNA molecular weight markers (Smart Ladder, Eurogentec); kb, size in kilobases.

**B.** Genomic polymorphism of the *SBS* gene. PCR was performed with primers genomic DNA 8D08 and 8G01 on genomic DNA of the following plant species: 1, *S. habrochaites* LA1777; 2, *S. lycopersicum* E6203; 3, no DNA control. M, DNA molecular weight markers (Smart Ladder, Eurogentec); kb, size in kilobases.

The sequence of the primers is available in Supplemental Table 4 online.

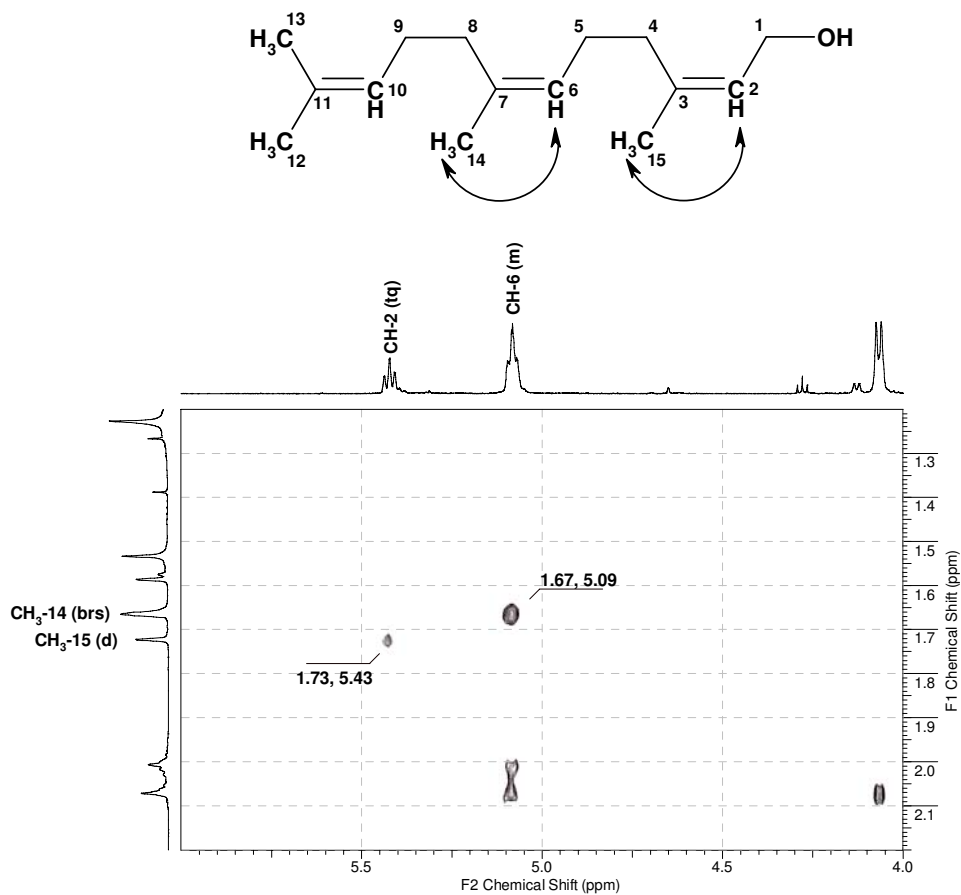

**Supplemental Figure 4.** <sup>1</sup>H/<sup>1</sup>H NMR 2D-NOESY spectrum of Z,Z-farnesol. Peaks that support the Z,Z configuration are shown.

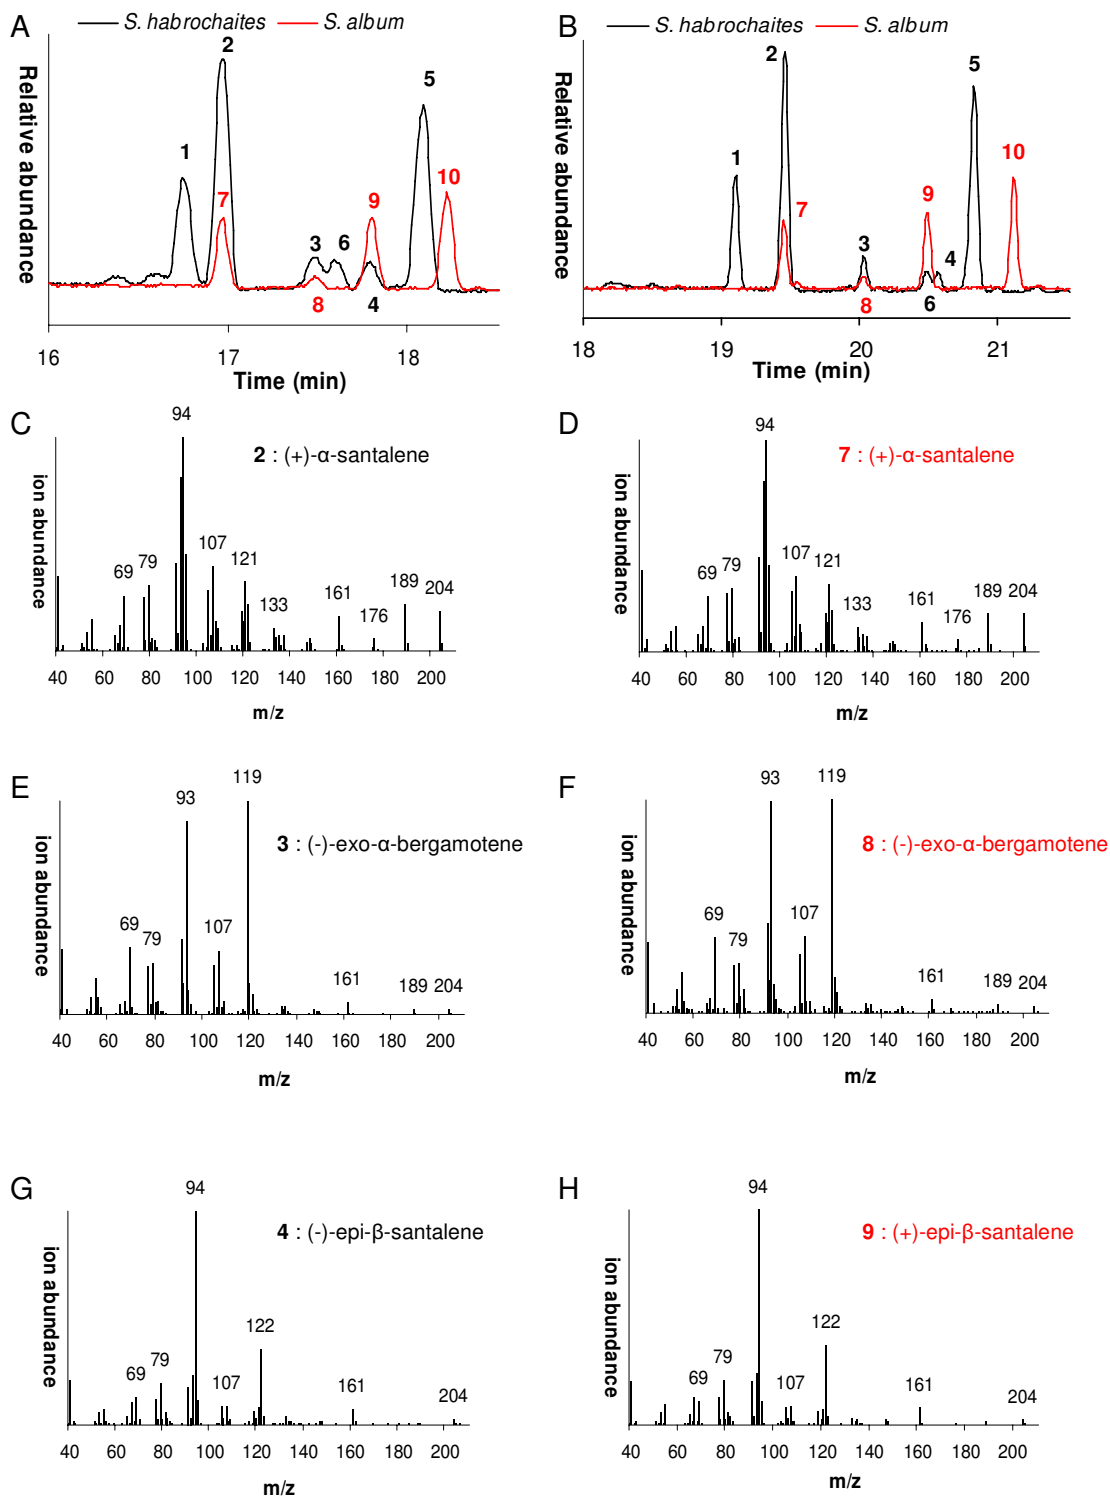

**Supplemental Figure 5.** GC-MS comparison of a leaf exudate extract from *S. habrochaites* and *Santalum album* essential oil.

(**A**, **B**) GC-MS Chromatograms of *S. habrochaites* leaf extract and *Santalum album* essential oil on non-chiral (**A**) or chiral (**B**) columns. The numbers (1 through 6) in black indicate the peaks of *S. habrochaites* and the numbers in red (7 through 10), those of *S. album*. Sesquiterpene olefinic compounds from sandalwood oil were identified on the basis of their mass spectra, matches in the NIST database, and comparison with the ISO standards description (reference ISO 3518:2002). (**C** through **H**). Mass spectra of the peaks common to *S. habrochaites* and *S. album*. Peaks are as

follows: **(1)**, (-)-exo- $\alpha$ -bergamotene; **(2)** and **(7)**, (+)- $\alpha$ -santalene; **(3)** and **(8)**, (-)-endo- $\alpha$ -bergamotene; **(4)**, (-)-epi- $\beta$ -santalene; **(5)**, (+)-endo- $\beta$ -bergamotene, **(6)**, unknown sesquiterpene from *S. habrochaites* which is not a product of SBS activity; **(9)**, (+)-epi- $\beta$ -santalene; **(10)**,  $\beta$ -santalene.

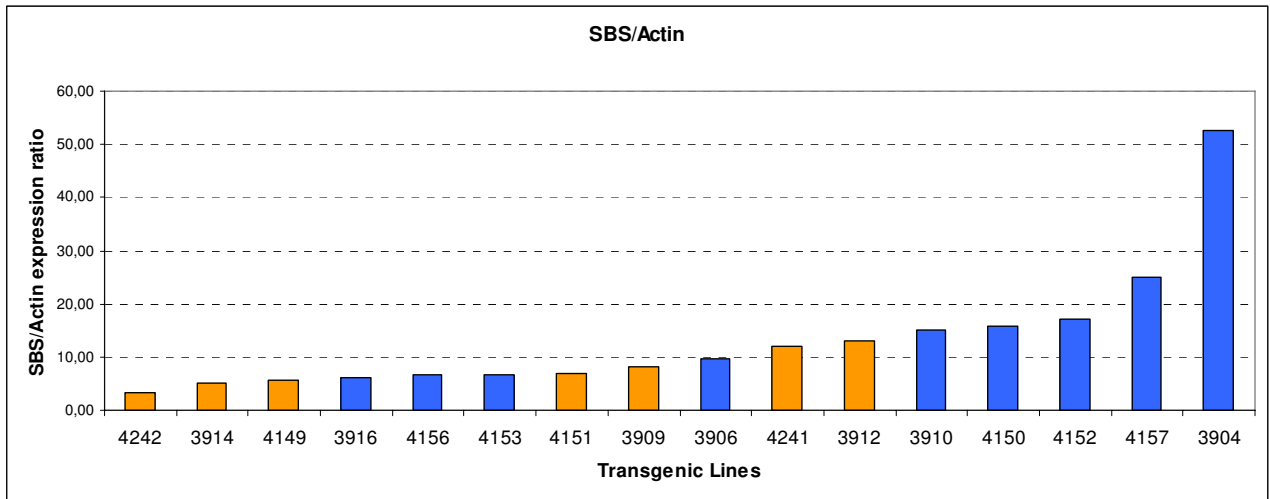

**Supplemental Figure 6.** Quantification of *SBS* transgene expression in tobacco. Real-time RT-PCR was done in duplex using a *SBS*-specific FAM probe and an *Actin*-specific VIC probe. The expression ratio was calculated as  $2^{(CtActin - CtSBS)}$ , where *CtActin* and *CtSBS* represent the cycle threshold (*Ct*) average of triplicates of the *Actin* and *SBS* signals respectively. The expression was measured on primary transformants. The orange bars correspond to single copy T-DNA transformants and the blue bars to multicopy T-DNA transformants. The highest expressing single-copy lines were selected for volatile analysis. Line 6009 analyzed in Figure 6 is a homozygous progeny of line 3912

**Supplemental Table 1:** Complete  $^1\text{H}$  and  $^{13}\text{C}$  NMR assignments for *Z,Z*-farnesol and correlation table ( $\text{CDCl}_3$ ).

a) Values were recorded at 500 MHz, s, singlet; brs, broad singlet, d, doublet, tq, triplet quadruplet; m, multiplet. (J in Hz). b) Values were recorded at 125 MHz.

\*  $^{13}\text{C}$  quaternary signal too weak to be assigned

| Atom | $\delta_{\text{H}}$ (ppm) <sup>a</sup> | NOESY  | $\delta_{^{13}\text{C-HMQC}}$ (ppm) <sup>b</sup> |
|------|----------------------------------------|--------|--------------------------------------------------|
| 1    | 4.07, d, (7.1)                         | 4      | 58.8                                             |
| 2    | 5.43, tq, (7.3, 1.0)                   | 3      | 124.3                                            |
| 3    | -                                      | -      | -*                                               |
| 4    |                                        | 1, 15  | 32.1                                             |
| 5    | 2.08, m                                | 6, 8   | 26.1                                             |
| 6    | 5.09, m                                | 5, 14  | 124.7                                            |
| 7    | -                                      | -      | -*                                               |
| 8    |                                        | 6, 14  | 31.8                                             |
| 9    | 2.01, m                                | 10, 13 | 26.3                                             |
| 10   | 5.09, m                                | 9, 12  | 124.7                                            |
| 11   | -                                      | -      | -*                                               |
| 12   | 1.67, brs                              | 10     | 25.6                                             |
| 13   | 1.59, s                                | 9      | 17.5                                             |
| 14   | 1.67, brs                              | 6, 8   | 23.1                                             |
| 15   | 1.73, d, (1.0)                         | 2, 4   | 23.3                                             |



**Supplemental Table 2.** Arabidopsis genes and proteins presenting similarity to Z-IPPS.  
The colors indicate genes which are associated in gene clusters on the Arabidopsis genome.

| Arabidopsis locus | Genbank protein ID | Protein symbol | Length (aa) | Predicted cell compartment* | Function                          | references                                |
|-------------------|--------------------|----------------|-------------|-----------------------------|-----------------------------------|-------------------------------------------|
| At2g17570         | NP_565420          | DDPS6          | 295         | Mito                        | Unknown                           |                                           |
| At2g23400         | NP_179921          | None           | 253         | Other                       | Unknown                           |                                           |
| At2g23410         | NP_565551          | ACPT/DDP:      | 303         | Secreted                    | polyprenyl pyrophosphate synthase | Oh et al. (2000); Cunillera et al. (2000) |
| At5g58770         | NP_200685          | DDPS2          | 310         | Mito                        | Unknown                           |                                           |
| At5g58780         | NP_568882          | DDPS3          | 302         | Secreted                    | Unknown                           |                                           |
| At5g58782         | NP_568883          | DDPS4          | 289         | Secreted                    | Unknown                           |                                           |
| At5g58784         | NP_568884          | DDPS5          | 302         | Other                       | Unknown                           |                                           |
| At5g60500         | NP_200858          | DDPS7          | 271         | Other                       | Unknown                           |                                           |
| At5g60510         | NP_200859          | DDPS8          | 271         | Other                       | Unknown                           |                                           |

\*according to TargetP software

**Supplemental Table 3:** List of plant terpene synthases used to generate the phylogenetic tree in Figure 2. GI number: protein identification number in Genbank. Full name: includes the function and the species name in brackets. Short name is the abbreviated name appearing on Figure 2. Tps group: corresponds to the nomenclature of plant terpene synthases described by Bohlmann et al. (1998) and updated in Martin et al. (2004).

| GI number | Full name [species]                                                              | Short name (on Figure 2)                 | Tps group |
|-----------|----------------------------------------------------------------------------------|------------------------------------------|-----------|
| 2754818   | (E)-B-farnesene synthase [ <i>Mentha x piperita</i> ]                            | Mp (E)-B-farnesene syn                   | a         |
| 7381217   | amorpha-4,11-diene synthase [ <i>Artemisia annua</i> ]                           | Aa amorphadiene syn                      | a         |
| 14134188  | (E)-beta-farnesene synthase [ <i>Citrus junos</i> ]                              | Cj (E)-beta-farnesene syn                | a         |
| 29468410  | beta-caryophyllene/alpha-humulene synthase [ <i>Arabidopsis thaliana</i> ]       | At beta-caryophyllene/alpha-humulene syn | a         |
| 28380030  | Casbene synthase, chloroplast precursor [ <i>Ricinus communis</i> ]              | Rc casbene syn                           | a         |
| 3687297   | 5-epi-aristolochene synthase [ <i>Capsicum annuum</i> var. <i>annuum</i> ]       | Ca 5-epi-aristolochene syn               | a         |
| 505588    | 5-epi-aristolochene synthase [ <i>Nicotiana tabacum</i> ]                        | Nt 5-epi-aristolochene syn               | a         |
| 8389329   | (+)-delta-cadinene synthase [ <i>Gossypium hirsutum</i> ]                        | Gh (+)-delta-cadinene syn                | a         |
| 14279758  | (-)-beta-pinene synthase [ <i>Artemisia annua</i> ]                              | Aa (-)-beta-pinene syn                   | b         |
| 21435703  | (+)-limonene synthase 1 [ <i>Citrus limon</i> ]                                  | Cl (+)-limonene syn                      | b         |
| 82408415  | trans-alpha-bergamotene synthase [ <i>Lavandula angustifolia</i> ]               | La trans-alpha-bergamotene syn           | b         |
| 22900832  | linalool synthase [ <i>Mentha aquatica</i> ]                                     | Ma linalool syn                          | b         |
| 3309121   | (+)-sabinene synthase [ <i>Salvia officinalis</i> ]                              | So (+)-sabinene syn                      | b         |
| 410230    | 4S-limonene synthase [ <i>Mentha spicata</i> ]                                   | Ms 4S-limonene syn                       | b         |
| 9957293   | myrcene/ocimene synthase [ <i>Arabidopsis thaliana</i> ]                         | At myrcene/ocimene syn                   | b         |
| 32265058  | (E,E)-alpha-farnesene synthase [ <i>Malus x domestica</i> ]                      | Md (E,E)-alpha-farnesene syn             | b         |
| 29468398  | linalool synthase [ <i>Arabidopsis thaliana</i> ]                                | At linalool syn                          | b         |
| 30349142  | myrcene synthase [ <i>Antirrhinum majus</i> ]                                    | Am myrcene syn                           | b         |
| 15235504  | ent-copalyl diphosphate synthase [ <i>Arabidopsis thaliana</i> ]                 | At ent-copalyl diP syn                   | c         |
| 2642661   | copalyl pyrophosphate synthase [ <i>Stevia rebaudiana</i> ]                      | Sr copalyl diP syn                       | c         |
| 6009478   | copalyl diphosphate synthase [ <i>Solanum lycopersicum</i> ]                     | Sl copalyl diP syn                       | c         |
| 1477584   | abietadiene cyclase [ <i>Abies grandis</i> ]                                     | Ag abietadiene cyclase                   | d         |
| 44804521  | levopimaradiene/abietadiene synthase [ <i>Picea abies</i> ]                      | Pa levopimaradiene/abietadiene syn       | d         |
| 77546864  | isopimaradiene synthase [ <i>Picea abies</i> ]                                   | Pa isopimaradiene syn                    | d         |
| 15865605  | levopimaradiene synthase [ <i>Ginkgo biloba</i> ]                                | Gb levopimaradiene syn                   | d         |
| 2961462   | gamma-humulene synthase [ <i>Abies grandis</i> ]                                 | Ag gamma-humulene syn                    | d         |
| 44804575  | longifolene synthase [ <i>Picea abies</i> ]                                      | Pa longifolene syn                       | d         |
| 28558360  | Taxadiene synthase (Taxa-4(5),11(12)-diene synthase) [ <i>Taxus brevifolia</i> ] | Tb taxadiene syn                         | d         |
| 3252840   | E-alpha-bisabolene synthase [ <i>Abies grandis</i> ]                             | Ag E-alpha-bisabolene syn                | d         |
| 44804486  | E-alpha-bisabolene synthase [ <i>Picea abies</i> ]                               | Pa E-alpha-bisabolene syn                | d         |
| 2411481   | myrcene synthase [ <i>Abies grandis</i> ]                                        | Ag myrcene syn                           | d         |
| 44804558  | (-)-limonene synthase [ <i>Picea abies</i> ]                                     | Pa (-)-limonene syn                      | d         |
| 2429145   | (-)-4S-limonene synthase [ <i>Abies grandis</i> ]                                | Ag (-)-4S-limonene syn                   | d         |
| 2411483   | pinene synthase [ <i>Abies grandis</i> ]                                         | Ag pinene syn                            | d         |
| 44804535  | (-)-alpha/beta-pinene synthase [ <i>Picea abies</i> ]                            | Pa (-)-alpha/beta-pinene syn             | d         |
| Submitted | Santalene and bergamotene synthase [ <i>Solanum habrochaites</i> ]               | SBS                                      | e         |
| 111607670 | iso kaurene synthase [ <i>Oryza sativa</i> ]                                     | Os iso kaurene synthase 1                | e         |
| 50788718  | Stemar-13-en synthase [ <i>Oryza sativa</i> ]                                    | Os stemarene syn                         | e         |
| 73532938  | stemodene synthase [ <i>Oryza sativa</i> ]                                       | Os stemodene syn                         | e         |
| 111607676 | ent-sandaracopimaradiene synthase [ <i>Oryza sativa</i> ]                        | Os ent-sandaracopimaradiene syn          | e         |
| 28201163  | ent-cassa-12-15-diene [ <i>Oryza sativa</i> ]                                    | Os cassadiene syn                        | e         |
| 34452214  | ent-kaurene synthase 1A [ <i>Oryza sativa</i> ]                                  | Os ent-kaurene syn                       | e         |
| 51537819  | syn-pimara-7,15-diene synthase [ <i>Oryza sativa</i> ]                           | Os syn-pimaradiene syn                   | e         |
| 3056725   | ent-kaurene synthase [ <i>Arabidopsis thaliana</i> ]                             | At ent-kaurene syn                       | e         |
| 4959239   | kaurene synthase [ <i>Stevia rebaudiana</i> ]                                    | Sr ent-kaurene syn                       | e         |
| 62900385  | Ent-kaurene synthase B [ <i>Cucurbita maxima</i> ]                               | Cm ent-kaurene syn                       | e         |
| 1491939   | S-linalool synthase [ <i>Clarkia breweri</i> ]                                   | Cb S-linalool syn                        | f         |

**Supplemental Table 4.** List of oligonucleotide primers and probes used in this study.

| Name      | Sequence (5' to 3')                                        | Dyes      |
|-----------|------------------------------------------------------------|-----------|
| 7C06      | GGGGACAACCTTTGTATAGAAAAGTTGACGCCAGGGTTTTCCAGTCACG          |           |
| 7C07      | GGGGACTGCTTTTTTTGTACAAACTTGTGTGGAATTGTGAGCGGATAACAATTTCA   |           |
| 7C08      | GGGGACAAGTTTGTACAAAAAAGCAGGCTACGCCAGGGTTTTCCAGTCACG        |           |
| 7C09      | GGGGACCACTTTGTACAAGAAAGCTGGGTTGTGGAATTGTGAGCGGATAACAATTTCA |           |
| 7D01      | GGGGACAGCTTTCTTGTACAAAGTGGACGCCAGGGTTTTCCAGTCACG           |           |
| 7D02      | GGGGACAACCTTTGTATAATAAAGTTGTGTGGAATTGTGAGCGGATAACAATTTCA   |           |
| 7E06      | AGTCTAGACGTTGTAAAACGACGGCCAGTGA                            |           |
| 7E07      | AGTCTAGAGGAAACAGCTATGACCATGATTACG                          |           |
| 7F05      | TCCATGGTAGTTGGCTATAGAAGCACAATCA                            |           |
| 7I06      | CTTTTAGTAAGCCGGATCCACTAGATTACGCCCGCCCTG                    |           |
| 7I07      | CAGGGCGGGCGTAATCTAGTGGATCCGGCTTACTAAAAG                    |           |
| 8D05      | TCTCGAGCATAAATTCAAATTGAGGGATTAATGA                         |           |
| 8D06      | GCTGCTCGAGATGATTGAGTGGTTTGTAAAAGACTTCA                     |           |
| 8D08      | CTGGTAAGCATATGATAGTTGGCTATAGAAGCACAATCA                    |           |
| 8G01      | TTTCATCTAGAGCTTTCTTTATTTCTGA                               |           |
| 8H08      | GAAGAACATTTTTTTGCAACAAGTGGGAAATATACAAG                     |           |
| 8H09      | CTTGATATTTCCCACTTGTGCAAAAAAATGTTCTTC                       |           |
| 9I01      | ACATATGAGTTCTTTGGTCTTCAATGTTGGA                            |           |
| 9I02      | ACTCGAGATATGTGTGTCCACCAAACGTCTATG                          |           |
| 10D01     | TCCATGGGTATGAGTTCTTTGGTTCTTCAATGTTG                        |           |
| 10D02     | TCTCGAGTCAATATGTGTGTCCACCAAACGT                            |           |
| 14F02     | CGGGGTACCATGAGTTCTTTGGTTCTTCA                              |           |
| 14F03     | CGGGGTACCTAAGCTGAGTGAGCATGAA                               |           |
| 14F04     | CGGGGTACCATGATAGTTGGCTATAGAAGCA                            |           |
| 14F05     | CGGGGTACCTACTTTCCAAAACTTCCCT                               |           |
| SBS-For   | TTGTCCCGAGCCTGAATT                                         |           |
| SBS-Rev   | CATCGACAATAGTCAGGAGCAAGA                                   |           |
| SBS-Pr    | TCCGATGCTCGTCTCTTGTACGCG                                   | FAM/TAMRA |
| Actin-For | TCATCACAATCGGTGCTGAGA                                      |           |
| Actin-Rev | ATTCCTACTGCTTCCATTCCAATAAAT                                |           |
| Actin-Pr  | TGCCCTGAGGTTCTCTTCCAGCCA                                   | VIC/TAMRA |
